# Supplementary material
Source: publisher figshare collection journal article supplement (https://acs.figshare.com/ndownloader/files/3986977)
Supplement: Supplementary file 1 [file 3986977]

data_global
_audit_creation_method                  'APEX2 v2012.4-3'

_publ_requested_journal                 ?

_publ_contact_author_name               ?
_publ_contact_author_address            
;
;
_publ_contact_author_email              ?
_publ_contact_author_fax                ?
_publ_contact_author_phone              ?

_publ_section_title                     
;
;
_publ_section_abstract                  
;
;
_publ_section_references                
;
;
_publ_section_comment                   
;
;

data_I
_chemical_name_systematic               ?
_chemical_name_common                   ?
_chemical_formula_moiety                ?
_chemical_formula_sum                   'C26 H38 F6 Fe N4 O6 S2'
_chemical_formula_iupac                 'C26 H38 F6 Fe N4 O6 S2'
_chemical_formula_weight                736.57

_chemical_melting_point                 ?

_space_group_crystal_system             monoclinic
_space_group_name_H-M_alt               'P 1 21/c 1'
_space_group_name_Hall                  '-P 2ybc'
loop_
    _space_group_symop_operation_xyz
    'x, y, z'
    '-x, y+1/2, -z+1/2'
    '-x, -y, -z'
    'x, -y-1/2, z-1/2'

_cell_length_a                          30.947(15)
_cell_length_b                          14.850(7)
_cell_length_c                          23.242(11)
_cell_angle_alpha                       90
_cell_angle_beta                        107.758(9)
_cell_angle_gamma                       90
_cell_volume                            10172.(8)
_cell_formula_units_Z                   12
_cell_measurement_reflns_used           ?
_cell_measurement_theta_min             ?
_cell_measurement_theta_max             ?
_cell_measurement_temperature           296.(2)

_exptl_crystal_description              ?
_exptl_crystal_colour                   ?
_exptl_crystal_size_max                 ?
_exptl_crystal_size_mid                 ?
_exptl_crystal_size_min                 ?
_exptl_crystal_density_diffrn           1.443
_exptl_crystal_density_meas             ?
_exptl_crystal_density_method           'not measured'
_exptl_crystal_F_000                    4584

_exptl_absorpt_coefficient_mu           0.644
_exptl_absorpt_correction_type          ?
_exptl_absorpt_process_details          
;
;
_exptl_absorpt_correction_T_min         ?
_exptl_absorpt_correction_T_max         ?

_exptl_special_details                  
;
; 

_diffrn_ambient_temperature             296.(2)

_diffrn_source                          ?
_diffrn_source_type                     ?

_diffrn_radiation_type                  ?
_diffrn_radiation_wavelength            0.71073
_diffrn_radiation_monochromator         ?

_diffrn_measurement_device_type         ?
_diffrn_measurement_method              ?

_diffrn_detector_area_resol_mean        ?

_diffrn_reflns_number                   116398
_diffrn_reflns_av_R_equivalents         0.0990
_diffrn_reflns_av_sigmaI/netI           0.0890
_diffrn_reflns_theta_min                1.38
_diffrn_reflns_theta_max                27.73
_diffrn_reflns_theta_full               27.73
_diffrn_measured_fraction_theta_max     0.975
_diffrn_measured_fraction_theta_full    0.975
_diffrn_reflns_limit_h_min              -40
_diffrn_reflns_limit_h_max              40
_diffrn_reflns_limit_k_min              -19
_diffrn_reflns_limit_k_max              19
_diffrn_reflns_limit_l_min              -29
_diffrn_reflns_limit_l_max              29

_refine_special_details                 
;
Refinement of F^2^ against ALL reflections.  The weighted R-factor wR and
goodness of fit S are based on F^2^, conventional R-factors R are based
on F, with F set to zero for negative F^2^. The threshold expression of
F^2^ > 2sigma(F^2^) is used only for calculating R-factors(gt) etc. and is
not relevant to the choice of reflections for refinement.  R-factors based
on F^2^ are statistically about twice as large as those based on F, and R-
factors based on ALL data will be even larger.
;

_reflns_number_total                    23306
_reflns_number_gt                       12472
_reflns_threshold_expression            >2sigma(I)

_refine_ls_structure_factor_coef        Fsqd
_refine_ls_matrix_type                  full
_refine_ls_R_factor_all                 0.1444
_refine_ls_R_factor_gt                  0.0733
_refine_ls_wR_factor_gt                 0.1807
_refine_ls_wR_factor_ref                0.2276
_refine_ls_goodness_of_fit_ref          0.969
_refine_ls_restrained_S_all             0.969
_refine_ls_number_reflns                23306
_refine_ls_number_parameters            1235
_refine_ls_number_restraints            0
_refine_ls_hydrogen_treatment           mixed
_refine_ls_weighting_scheme             calc
_refine_ls_weighting_details
    'calc w=1/[\s^2^(Fo^2^)+(0.1060P)^2^+30.9135P] where P=(Fo^2^+2Fc^2^)/3'

_atom_sites_solution_hydrogens          geom
_atom_sites_solution_primary            direct
_atom_sites_solution_secondary          difmap

_refine_ls_shift/su_max                 0.001
_refine_ls_shift/su_mean                0.000
_refine_diff_density_max                4.071
_refine_diff_density_min                -0.741
_refine_ls_extinction_method            none
_refine_ls_extinction_coef              ?

loop_
    _atom_type_symbol
    _atom_type_description
    _atom_type_scat_dispersion_real
    _atom_type_scat_dispersion_imag
    _atom_type_scat_source
    C C 0.0033 0.0016 'International Tables Vol C Tables 4.2.6.8 and 6.1.1.4'
    N N 0.0061 0.0033 'International Tables Vol C Tables 4.2.6.8 and 6.1.1.4'
    O O 0.0106 0.0060 'International Tables Vol C Tables 4.2.6.8 and 6.1.1.4'
    F F 0.0171 0.0103 'International Tables Vol C Tables 4.2.6.8 and 6.1.1.4'
    S S 0.1246 0.1234 'International Tables Vol C Tables 4.2.6.8 and 6.1.1.4'
    Fe Fe 0.3463 0.8444
     'International Tables Vol C Tables 4.2.6.8 and 6.1.1.4'
    H H 0.0000 0.0000 'International Tables Vol C Tables 4.2.6.8 and 6.1.1.4'

_computing_data_collection              ?
_computing_cell_refinement              ?
_computing_data_reduction               ?
_computing_structure_solution           'SHELXS-97 (Sheldrick, 2008)'
_computing_structure_refinement         'SHELXL-97 (Sheldrick, 2008)'
_computing_molecular_graphics           ?
_computing_publication_material         ?

loop_
    _atom_site_type_symbol
    _atom_site_label
    _atom_site_fract_x
    _atom_site_fract_y
    _atom_site_fract_z
    _atom_site_U_iso_or_equiv
    _atom_site_adp_type
    _atom_site_calc_flag
    _atom_site_refinement_flags
    _atom_site_occupancy
    _atom_site_disorder_assembly
    _atom_site_disorder_group
    Fe Fe1 0.41784(2) 0.15912(4) 0.16846(3) 0.01145(15) Uani d . 1 . .
    Fe Fe2 0.24906(2) 0.84243(4) 0.48262(3) 0.01363(15) Uani d . 1 . .
    Fe Fe3 0.08540(2) 0.33420(5) 0.31851(3) 0.01707(17) Uani d . 1 . .
    S S1 0.46204(4) -0.04704(8) 0.17039(5) 0.0164(2) Uani d . 1 . .
    S S2 0.31710(4) 0.06496(8) 0.16010(5) 0.0185(3) Uani d . 1 . .
    S S3 0.35137(4) 0.93496(8) 0.49389(5) 0.0182(3) Uani d . 1 . .
    S S4 0.20419(4) 1.04718(8) 0.48076(5) 0.0184(3) Uani d . 1 . .
    S S5 0.12651(4) 0.54211(9) 0.31404(7) 0.0289(3) Uani d . 1 . .
    S S6 -0.01739(4) 0.41441(9) 0.33013(6) 0.0272(3) Uani d . 1 . .
    F F1 0.49934(11) -0.1721(2) 0.12219(16) 0.0404(9) Uani d . 1 . .
    F F2 0.34658(12) -0.0616(2) 0.24208(15) 0.0362(8) Uani d . 1 . .
    F F3 0.43183(14) -0.1332(3) 0.06808(17) 0.0636(13) Uani d . 1 . .
    F F4 0.48892(17) -0.0470(3) 0.07456(19) 0.0670(14) Uani d . 1 . .
    F F5 0.30672(14) 0.0419(2) 0.26665(16) 0.0504(10) Uani d . 1 . .
    F F6 0.27390(13) -0.0592(3) 0.2004(2) 0.0625(12) Uani d . 1 . .
    F F7 0.32490(12) 1.0616(2) 0.41176(14) 0.0350(8) Uani d . 1 . .
    F F8 0.16925(12) 1.1761(2) 0.52840(17) 0.0430(9) Uani d . 1 . .
    F F9 0.23667(12) 1.1364(3) 0.58157(16) 0.0497(10) Uani d . 1 . .
    F F10 0.17929(14) 1.0525(3) 0.57856(17) 0.0526(10) Uani d . 1 . .
    F F11 0.36164(13) 0.9543(2) 0.38665(16) 0.0470(10) Uani d . 1 . .
    F F12 0.39737(13) 1.0523(3) 0.4525(2) 0.0638(12) Uani d . 1 . .
    F F13 0.17397(13) 0.6546(2) 0.2709(2) 0.0574(11) Uani d . 1 . .
    F F14 0.01170(14) 0.5220(3) 0.42410(16) 0.0504(10) Uani d . 1 . .
    F F15 -0.00761(13) 0.3882(3) 0.44517(16) 0.0522(10) Uani d . 1 . .
    F F16 0.18280(15) 0.5136(3) 0.25033(19) 0.0586(11) Uani d . 1 . .
    F F17 -0.05882(14) 0.4863(3) 0.4014(2) 0.0673(13) Uani d . 1 . .
    F F18 0.12239(16) 0.5845(4) 0.2020(2) 0.096(2) Uani d . 1 . .
    O O1 0.36094(10) 0.1075(2) 0.19032(14) 0.0186(7) Uani d . 1 . .
    O O2 0.43716(11) 0.0335(2) 0.14181(15) 0.0212(7) Uani d . 1 . .
    O O3 0.31760(13) 0.0036(2) 0.11256(16) 0.0300(9) Uani d . 1 . .
    O O4 0.43611(12) -0.1102(2) 0.19275(17) 0.0297(9) Uani d . 1 . .
    O O5 0.50700(12) -0.0291(2) 0.20901(16) 0.0273(8) Uani d . 1 . .
    O O6 0.27943(12) 0.1258(3) 0.14874(18) 0.0338(9) Uani d . 1 . .
    O O7 0.30683(10) 0.8963(2) 0.46385(15) 0.0204(7) Uani d . 1 . .
    O O8 0.35260(13) 0.9965(2) 0.54139(16) 0.0312(9) Uani d . 1 . .
    O O9 0.22839(12) 0.9665(2) 0.50994(15) 0.0233(8) Uani d . 1 . .
    O O10 0.23062(12) 1.1072(2) 0.45633(16) 0.0278(8) Uani d . 1 . .
    O O11 0.38760(12) 0.8705(3) 0.50537(18) 0.0330(9) Uani d . 1 . .
    O O12 0.15846(11) 1.0302(2) 0.44359(17) 0.0262(8) Uani d . 1 . .
    O O13 0.03028(11) 0.3870(2) 0.34449(16) 0.0261(8) Uani d . 1 . .
    O O14 0.10396(12) 0.4580(2) 0.28810(17) 0.0298(9) Uani d . 1 . .
    O O15 0.16521(14) 0.5291(3) 0.36580(17) 0.0371(10) Uani d . 1 . .
    O O16 -0.02990(15) 0.4896(3) 0.29139(18) 0.0393(10) Uani d . 1 . .
    O O17 -0.04857(13) 0.3401(3) 0.3189(2) 0.0431(11) Uani d . 1 . .
    O O18 0.09643(15) 0.6130(3) 0.3161(3) 0.0743(19) Uani d . 1 . .
    N N1 0.39271(12) 0.3012(3) 0.17027(16) 0.0136(8) Uani d . 1 . .
    N N2 0.37824(13) 0.1827(3) 0.07558(17) 0.0146(8) Uani d . 1 . .
    N N3 0.46007(13) 0.1417(3) 0.26074(17) 0.0163(8) Uani d . 1 . .
    N N4 0.48282(12) 0.2299(2) 0.17037(16) 0.0140(8) Uani d . 1 . .
    N N5 0.20893(13) 0.8616(3) 0.38947(17) 0.0176(8) Uani d . 1 . .
    N N6 0.27533(13) 0.7010(3) 0.48041(17) 0.0163(8) Uani d . 1 . .
    N N7 0.28544(13) 0.8162(2) 0.57535(17) 0.0162(8) Uani d . 1 . .
    N N8 0.18422(13) 0.7698(3) 0.47764(18) 0.0183(9) Uani d . 1 . .
    N N9 0.15108(13) 0.2656(3) 0.31855(18) 0.0185(9) Uani d . 1 . .
    N N10 0.12861(14) 0.3529(3) 0.41016(19) 0.0224(9) Uani d . 1 . .
    N N11 0.06179(13) 0.1919(3) 0.32205(17) 0.0167(8) Uani d . 1 . .
    N N12 0.04607(13) 0.3083(3) 0.22547(19) 0.0204(9) Uani d . 1 . .
    C C1 0.42808(14) 0.3581(3) 0.1559(2) 0.0142(9) Uani d . 1 . .
    H H1A 0.4253 0.4198 0.1679 0.017 Uiso calc R 1 . .
    H H1B 0.4233 0.3573 0.1127 0.017 Uiso calc R 1 . .
    C C2 0.35165(15) 0.2563(3) 0.0660(2) 0.0129(9) Uani d . 1 . .
    C C3 0.34892(15) 0.3060(3) 0.12117(19) 0.0143(9) Uani d . 1 . .
    H H3A 0.3412 0.3685 0.1109 0.017 Uiso calc R 1 . .
    H H3B 0.3251 0.2799 0.135 0.017 Uiso calc R 1 . .
    C C4 0.50441(16) 0.1578(3) 0.2715(2) 0.0179(10) Uani d . 1 . .
    C C5 0.47530(15) 0.3237(3) 0.1884(2) 0.0154(9) Uani d . 1 . .
    H H5A 0.4974 0.3633 0.1797 0.018 Uiso calc R 1 . .
    H H5B 0.4801 0.3253 0.2316 0.018 Uiso calc R 1 . .
    C C6 0.32628(16) 0.2834(3) 0.0078(2) 0.0203(10) Uani d . 1 . .
    H H6 0.3073 0.3334 0.0022 0.024 Uiso calc R 1 . .
    C C7 0.51987(15) 0.1870(3) 0.2188(2) 0.0182(10) Uani d . 1 . .
    H H7A 0.5448 0.2292 0.2329 0.022 Uiso calc R 1 . .
    H H7B 0.531 0.1349 0.2024 0.022 Uiso calc R 1 . .
    C C8 0.48878(15) 0.2216(3) 0.1092(2) 0.0172(10) Uani d . 1 . .
    H H8A 0.4597 0.2363 0.0803 0.021 Uiso calc R 1 . .
    H H8B 0.4939 0.1582 0.1036 0.021 Uiso calc R 1 . .
    C C9 0.36416(16) 0.3996(3) 0.2485(2) 0.0198(10) Uani d . 1 . .
    C C10 0.38856(16) 0.3165(3) 0.2320(2) 0.0173(10) Uani d . 1 . .
    H H10A 0.4192 0.3166 0.2597 0.021 Uiso calc R 1 . .
    H H10B 0.3737 0.2637 0.2416 0.021 Uiso calc R 1 . .
    C C11 0.44552(17) 0.1123(3) 0.3067(2) 0.0198(10) Uani d . 1 . .
    H H11 0.4148 0.1004 0.2993 0.024 Uiso calc R 1 . .
    C C12 0.31245(16) 0.3968(4) 0.2204(2) 0.0249(11) Uani d . 1 . .
    H H12A 0.2987 0.4385 0.2411 0.037 Uiso calc R 1 . .
    H H12B 0.3017 0.3371 0.224 0.037 Uiso calc R 1 . .
    H H12C 0.3046 0.4131 0.1785 0.037 Uiso calc R 1 . .
    C C13 0.35788(18) 0.1586(3) -0.0310(2) 0.0242(11) Uani d . 1 . .
    H H13 0.361 0.1247 -0.0631 0.029 Uiso calc R 1 . .
    C C14 0.53570(17) 0.1455(3) 0.3291(2) 0.0227(11) Uani d . 1 . .
    H H14 0.5663 0.1578 0.3357 0.027 Uiso calc R 1 . .
    C C15 0.38099(16) 0.1348(3) 0.0279(2) 0.0174(10) Uani d . 1 . .
    H H15 0.3991 0.0836 0.0347 0.021 Uiso calc R 1 . .
    C C16 0.47469(18) 0.0994(3) 0.3642(2) 0.0258(11) Uani d . 1 . .
    H H16 0.4637 0.0802 0.3952 0.031 Uiso calc R 1 . .
    C C17 0.52507(16) 0.2740(3) 0.0887(2) 0.0213(11) Uani d . 1 . .
    C C18 0.32994(18) 0.2341(3) -0.0414(2) 0.0261(12) Uani d . 1 . .
    H H18 0.314 0.2513 -0.0806 0.031 Uiso calc R 1 . .
    C C19 0.52074(18) 0.1153(4) 0.3753(2) 0.0287(12) Uani d . 1 . .
    H H19 0.5411 0.1056 0.4135 0.034 Uiso calc R 1 . .
    C C20 0.3109(2) -0.0068(4) 0.2206(3) 0.0325(13) Uani d . 1 . .
    C C21 0.52750(19) 0.2239(4) 0.0320(2) 0.0313(13) Uani d . 1 . .
    H H21A 0.4978 0.2212 0.0031 0.047 Uiso calc R 1 . .
    H H21B 0.5386 0.1639 0.0428 0.047 Uiso calc R 1 . .
    H H21C 0.5477 0.2553 0.0147 0.047 Uiso calc R 1 . .
    C C22 0.5100(2) 0.3702(4) 0.0689(3) 0.0371(14) Uani d . 1 . .
    H H22A 0.5304 0.3962 0.0496 0.056 Uiso calc R 1 . .
    H H22B 0.5104 0.4055 0.1037 0.056 Uiso calc R 1 . .
    H H22C 0.4799 0.3693 0.0411 0.056 Uiso calc R 1 . .
    C C23 0.38178(16) 0.4899(3) 0.2343(3) 0.0286(13) Uani d . 1 . .
    H H23A 0.3719 0.4993 0.1914 0.043 Uiso calc R 1 . .
    H H23B 0.4143 0.4901 0.2488 0.043 Uiso calc R 1 . .
    H H23C 0.3702 0.5372 0.2537 0.043 Uiso calc R 1 . .
    C C24 0.4711(2) -0.1031(4) 0.1057(3) 0.0331(13) Uani d . 1 . .
    C C25 0.3752(2) 0.3914(5) 0.3176(2) 0.0431(17) Uani d . 1 . .
    H H25A 0.4072 0.3997 0.3364 0.065 Uiso calc R 1 . .
    H H25B 0.3665 0.3328 0.3276 0.065 Uiso calc R 1 . .
    H H25C 0.3588 0.4366 0.332 0.065 Uiso calc R 1 . .
    C C26 0.57235(17) 0.2750(4) 0.1356(3) 0.0330(13) Uani d . 1 . .
    H H26A 0.5812 0.2146 0.1485 0.05 Uiso calc R 1 . .
    H H26B 0.5716 0.3106 0.1697 0.05 Uiso calc R 1 . .
    H H26C 0.5938 0.3005 0.1178 0.05 Uiso calc R 1 . .
    C C27 0.23974(16) 0.6431(3) 0.4924(2) 0.0193(10) Uani d . 1 . .
    H H27A 0.2436 0.6425 0.5354 0.023 Uiso calc R 1 . .
    H H27B 0.2432 0.5818 0.4799 0.023 Uiso calc R 1 . .
    C C28 0.17590(16) 0.7738(3) 0.5370(2) 0.0211(11) Uani d . 1 . .
    H H28A 0.1813 0.8357 0.5508 0.025 Uiso calc R 1 . .
    H H28B 0.1994 0.7378 0.5646 0.025 Uiso calc R 1 . .
    C C29 0.31818(15) 0.6957(3) 0.5313(2) 0.0165(10) Uani d . 1 . .
    H H29A 0.3426 0.7222 0.519 0.02 Uiso calc R 1 . .
    H H29B 0.3257 0.6331 0.5414 0.02 Uiso calc R 1 . .
    C C30 0.16479(16) 0.8409(3) 0.3763(2) 0.0175(10) Uani d . 1 . .
    C C31 0.19218(16) 0.6770(3) 0.4585(2) 0.0195(10) Uani d . 1 . .
    H H31A 0.1882 0.6768 0.4154 0.023 Uiso calc R 1 . .
    H H31B 0.1699 0.6364 0.4659 0.023 Uiso calc R 1 . .
    C C32 0.14813(15) 0.8149(3) 0.4285(2) 0.0196(10) Uani d . 1 . .
    H H32A 0.1379 0.8684 0.4445 0.024 Uiso calc R 1 . .
    H H32B 0.1224 0.7746 0.4142 0.024 Uiso calc R 1 . .
    C C33 0.30335(19) 0.8377(3) 0.6822(2) 0.0257(12) Uani d . 1 . .
    H H33 0.299 0.8699 0.7144 0.031 Uiso calc R 1 . .
    C C34 0.31376(15) 0.7445(3) 0.5860(2) 0.0169(10) Uani d . 1 . .
    C C35 0.33812(17) 0.7178(3) 0.6442(2) 0.0223(11) Uani d . 1 . .
    H H35 0.3579 0.6691 0.6503 0.027 Uiso calc R 1 . .
    C C36 0.28070(17) 0.8623(3) 0.6231(2) 0.0220(11) Uani d . 1 . .
    H H36 0.2616 0.9121 0.6162 0.026 Uiso calc R 1 . .
    C C37 0.28160(16) 0.6893(3) 0.4196(2) 0.0175(10) Uani d . 1 . .
    H H37A 0.2983 0.7416 0.4131 0.021 Uiso calc R 1 . .
    H H37B 0.2516 0.6934 0.3904 0.021 Uiso calc R 1 . .
    C C38 0.35534(16) 0.5986(4) 0.4361(2) 0.0247(11) Uani d . 1 . .
    H H38A 0.3589 0.5788 0.4766 0.037 Uiso calc R 1 . .
    H H38B 0.3695 0.6564 0.4372 0.037 Uiso calc R 1 . .
    H H38C 0.3694 0.556 0.4164 0.037 Uiso calc R 1 . .
    C C39 0.30482(16) 0.6061(3) 0.4013(2) 0.0195(10) Uani d . 1 . .
    C C40 0.35941(19) 1.0044(4) 0.4331(3) 0.0284(12) Uani d . 1 . .
    C C41 0.19673(19) 1.1061(4) 0.5456(3) 0.0288(12) Uani d . 1 . .
    C C42 0.33251(19) 0.7645(3) 0.6928(2) 0.0273(12) Uani d . 1 . .
    H H42 0.3481 0.7471 0.7321 0.033 Uiso calc R 1 . .
    C C43 0.22475(17) 0.8885(3) 0.3441(2) 0.0207(10) Uani d . 1 . .
    H H43 0.2554 0.9021 0.3531 0.025 Uiso calc R 1 . .
    C C44 0.13495(17) 0.8471(4) 0.3173(2) 0.0275(12) Uani d . 1 . .
    H H44 0.1045 0.8324 0.3091 0.033 Uiso calc R 1 . .
    C C45 0.19754(17) 0.8967(4) 0.2851(2) 0.0261(12) Uani d . 1 . .
    H H45 0.2095 0.9159 0.255 0.031 Uiso calc R 1 . .
    C C46 0.28107(17) 0.5171(3) 0.4048(3) 0.0296(13) Uani d . 1 . .
    H H46A 0.2926 0.471 0.3844 0.044 Uiso calc R 1 . .
    H H46B 0.249 0.5237 0.3857 0.044 Uiso calc R 1 . .
    H H46C 0.2867 0.5006 0.4463 0.044 Uiso calc R 1 . .
    C C47 0.15145(19) 0.8753(4) 0.2716(2) 0.0311(13) Uani d . 1 . .
    H H47 0.1322 0.88 0.2322 0.037 Uiso calc R 1 . .
    C C48 0.3007(2) 0.6252(4) 0.3347(2) 0.0336(14) Uani d . 1 . .
    H H48A 0.3146 0.6821 0.3317 0.05 Uiso calc R 1 . .
    H H48B 0.2692 0.627 0.3113 0.05 Uiso calc R 1 . .
    H H48C 0.3157 0.5784 0.3196 0.05 Uiso calc R 1 . .
    C C49 0.1303(2) 0.7451(4) 0.5468(3) 0.0388(15) Uani d . 1 . .
    C C50 0.19238(17) 0.2199(3) 0.2372(2) 0.0253(11) Uani d . 1 . .
    C C51 0.11540(18) 0.3819(3) 0.4573(2) 0.0252(11) Uani d . 1 . .
    H H51 0.0845 0.3898 0.4513 0.03 Uiso calc R 1 . .
    C C52 0.05759(17) 0.1733(3) 0.3826(2) 0.0219(11) Uani d . 1 . .
    H H52A 0.0433 0.2258 0.3937 0.026 Uiso calc R 1 . .
    H H52B 0.0882 0.1712 0.4102 0.026 Uiso calc R 1 . .
    C C53 0.09706(16) 0.1359(3) 0.3073(2) 0.0197(10) Uani d . 1 . .
    H H53A 0.0919 0.1362 0.264 0.024 Uiso calc R 1 . .
    H H53B 0.0949 0.0742 0.3198 0.024 Uiso calc R 1 . .
    C C54 0.17334(16) 0.3400(3) 0.4194(2) 0.0218(11) Uani d . 1 . .
    C C55 0.02038(17) 0.2326(3) 0.2171(2) 0.0208(11) Uani d . 1 . .
    C C56 0.18771(16) 0.3110(3) 0.3663(2) 0.0233(11) Uani d . 1 . .
    H H56A 0.1978 0.3635 0.349 0.028 Uiso calc R 1 . .
    H H56B 0.2133 0.2703 0.3801 0.028 Uiso calc R 1 . .
    C C57 0.15627(17) 0.2723(3) 0.2574(2) 0.0209(11) Uani d . 1 . .
    H H57A 0.161 0.3356 0.2508 0.025 Uiso calc R 1 . .
    H H57B 0.1271 0.2565 0.2291 0.025 Uiso calc R 1 . .
    C C58 0.14431(16) 0.1729(3) 0.3395(2) 0.0190(10) Uani d . 1 . .
    H H58A 0.1488 0.1742 0.3827 0.023 Uiso calc R 1 . .
    H H58B 0.1669 0.1329 0.3323 0.023 Uiso calc R 1 . .
    C C59 0.04973(18) 0.3510(3) 0.1762(2) 0.0250(11) Uani d . 1 . .
    H H59 0.0665 0.404 0.1818 0.03 Uiso calc R 1 . .
    C C60 0.01723(16) 0.1855(3) 0.2726(2) 0.0212(11) Uani d . 1 . .
    H H60A 0.0095 0.1228 0.2634 0.025 Uiso calc R 1 . .
    H H60B -0.0065 0.2129 0.286 0.025 Uiso calc R 1 . .
    C C61 -0.00154(18) 0.1994(4) 0.1598(2) 0.0276(12) Uani d . 1 . .
    H H61 -0.0197 0.1483 0.155 0.033 Uiso calc R 1 . .
    C C62 0.20517(18) 0.3558(4) 0.4754(3) 0.0300(13) Uani d . 1 . .
    H H62 0.2358 0.3454 0.4809 0.036 Uiso calc R 1 . .
    C C63 0.1451(2) 0.4005(4) 0.5141(3) 0.0324(13) Uani d . 1 . .
    H H63 0.1345 0.4212 0.5452 0.039 Uiso calc R 1 . .
    C C64 -0.01941(17) 0.0965(4) 0.3713(3) 0.0310(13) Uani d . 1 . .
    H H64A -0.0331 0.0572 0.3936 0.046 Uiso calc R 1 . .
    H H64B -0.0288 0.079 0.3296 0.046 Uiso calc R 1 . .
    H H64C -0.0288 0.1573 0.3748 0.046 Uiso calc R 1 . .
    C C65 0.03256(17) 0.0901(4) 0.3970(2) 0.0255(11) Uani d . 1 . .
    C C66 0.1771(2) 0.1229(4) 0.2176(3) 0.0401(15) Uani d . 1 . .
    H H66A 0.1466 0.1237 0.1908 0.06 Uiso calc R 1 . .
    H H66B 0.1783 0.0875 0.2527 0.06 Uiso calc R 1 . .
    H H66C 0.1968 0.0971 0.1973 0.06 Uiso calc R 1 . .
    C C67 0.00393(19) 0.2434(4) 0.1099(3) 0.0334(13) Uani d . 1 . .
    H H67 -0.0098 0.2211 0.0712 0.04 Uiso calc R 1 . .
    C C68 0.0302(2) 0.3211(4) 0.1181(3) 0.0338(13) Uani d . 1 . .
    H H68 0.0344 0.3519 0.0854 0.041 Uiso calc R 1 . .
    C C69 0.04787(18) -0.0008(4) 0.3776(3) 0.0333(14) Uani d . 1 . .
    H H69A 0.0804 -0.0045 0.3918 0.05 Uiso calc R 1 . .
    H H69B 0.0376 -0.0052 0.3343 0.05 Uiso calc R 1 . .
    H H69C 0.0352 -0.0492 0.3946 0.05 Uiso calc R 1 . .
    C C70 -0.0186(2) 0.4544(4) 0.4040(3) 0.0380(14) Uani d . 1 . .
    C C71 0.1911(2) 0.3869(4) 0.5230(3) 0.0359(14) Uani d . 1 . .
    H H71 0.2122 0.3986 0.5604 0.043 Uiso calc R 1 . .
    C C72 0.1953(2) 0.2690(4) 0.1805(3) 0.0360(14) Uani d . 1 . .
    H H72A 0.2045 0.3302 0.1905 0.054 Uiso calc R 1 . .
    H H72B 0.1661 0.2682 0.1503 0.054 Uiso calc R 1 . .
    H H72C 0.2171 0.2394 0.1652 0.054 Uiso calc R 1 . .
    C C73 0.1518(2) 0.5756(5) 0.2550(3) 0.0464(18) Uani d . 1 . .
    C C74 0.0444(2) 0.0911(5) 0.4664(3) 0.0445(17) Uani d . 1 . .
    H H74A 0.0338 0.1463 0.479 0.067 Uiso calc R 1 . .
    H H74B 0.0767 0.0867 0.4842 0.067 Uiso calc R 1 . .
    H H74C 0.03 0.041 0.4793 0.067 Uiso calc R 1 . .
    C C75 0.23951(18) 0.2185(4) 0.2847(3) 0.0375(14) Uani d . 1 . .
    H H75A 0.2612 0.1938 0.2671 0.056 Uiso calc R 1 . .
    H H75B 0.2385 0.1821 0.3184 0.056 Uiso calc R 1 . .
    H H75C 0.2482 0.2788 0.2983 0.056 Uiso calc R 1 . .
    C C76 0.1401(2) 0.7396(6) 0.6140(3) 0.054(2) Uani d . 1 . .
    H H76A 0.1123 0.7305 0.6234 0.081 Uiso calc R 1 . .
    H H76B 0.154 0.7947 0.6322 0.081 Uiso calc R 1 . .
    H H76C 0.1603 0.6902 0.6295 0.081 Uiso calc R 1 . .
    C C77 0.0937(2) 0.8219(5) 0.5253(3) 0.0482(17) Uani d . 1 . .
    H H77A 0.0682 0.809 0.5393 0.072 Uiso calc R 1 . .
    H H77B 0.0838 0.8247 0.482 0.072 Uiso calc R 1 . .
    H H77C 0.1068 0.8786 0.5414 0.072 Uiso calc R 1 . .
    C C78 0.1094(2) 0.6595(5) 0.5151(3) 0.0523(19) Uani d . 1 . .
    H H78A 0.1302 0.6104 0.5287 0.078 Uiso calc R 1 . .
    H H78B 0.103 0.6668 0.4723 0.078 Uiso calc R 1 . .
    H H78C 0.0817 0.6469 0.5242 0.078 Uiso calc R 1 . .

loop_
    _atom_site_aniso_label
    _atom_site_aniso_U_11
    _atom_site_aniso_U_22
    _atom_site_aniso_U_33
    _atom_site_aniso_U_12
    _atom_site_aniso_U_13
    _atom_site_aniso_U_23
    Fe1 0.0104(3) 0.0113(3) 0.0107(3) 0.0008(2) 0.0003(2) -0.0015(2)
    Fe2 0.0116(3) 0.0127(3) 0.0147(3) 0.0011(2) 0.0012(3) -0.0005(3)
    Fe3 0.0136(3) 0.0167(3) 0.0195(4) -0.0009(3) 0.0030(3) 0.0019(3)
    S1 0.0136(6) 0.0130(6) 0.0192(6) 0.0008(4) -0.0002(5) 0.0001(5)
    S2 0.0135(6) 0.0206(6) 0.0191(6) -0.0027(5) 0.0016(5) 0.0020(5)
    S3 0.0126(6) 0.0195(6) 0.0195(6) -0.0021(4) 0.0003(5) -0.0016(5)
    S4 0.0168(6) 0.0150(6) 0.0199(6) 0.0017(5) 0.0003(5) 0.0004(5)
    S5 0.0212(7) 0.0175(6) 0.0475(9) -0.0010(5) 0.0098(6) 0.0011(6)
    S6 0.0153(6) 0.0280(7) 0.0354(8) 0.0024(5) 0.0035(5) 0.0011(6)
    F1 0.041(2) 0.0260(17) 0.051(2) 0.0182(15) 0.0105(17) -0.0036(16)
    F2 0.052(2) 0.0246(17) 0.0349(19) 0.0077(15) 0.0181(16) 0.0097(14)
    F3 0.055(3) 0.076(3) 0.041(2) 0.025(2) -0.0137(19) -0.035(2)
    F4 0.117(4) 0.049(2) 0.063(3) 0.029(2) 0.068(3) 0.017(2)
    F5 0.076(3) 0.049(2) 0.041(2) 0.023(2) 0.039(2) 0.0096(18)
    F6 0.048(2) 0.062(3) 0.087(3) -0.025(2) 0.034(2) 0.011(2)
    F7 0.051(2) 0.0256(17) 0.0306(18) 0.0072(15) 0.0163(16) 0.0065(14)
    F8 0.040(2) 0.0283(18) 0.056(2) 0.0185(15) 0.0077(17) -0.0064(16)
    F9 0.040(2) 0.060(2) 0.037(2) 0.0077(18) -0.0058(16) -0.0268(18)
    F10 0.082(3) 0.046(2) 0.045(2) 0.011(2) 0.042(2) 0.0051(18)
    F11 0.066(3) 0.051(2) 0.035(2) 0.0185(19) 0.0328(19) 0.0050(17)
    F12 0.045(2) 0.075(3) 0.076(3) -0.032(2) 0.026(2) 0.014(2)
    F13 0.042(2) 0.036(2) 0.091(3) -0.0203(17) 0.016(2) 0.012(2)
    F14 0.063(3) 0.055(2) 0.035(2) -0.002(2) 0.0169(18) -0.0113(18)
    F15 0.054(2) 0.069(3) 0.040(2) 0.001(2) 0.0241(19) 0.017(2)
    F16 0.073(3) 0.050(2) 0.064(3) -0.015(2) 0.039(2) -0.008(2)
    F17 0.052(3) 0.093(3) 0.070(3) 0.020(2) 0.038(2) -0.004(3)
    F18 0.065(3) 0.140(5) 0.063(3) -0.048(3) -0.013(2) 0.058(3)
    O1 0.0140(16) 0.0235(18) 0.0161(17) -0.0052(14) 0.0013(13) 0.0011(14)
    O2 0.0242(18) 0.0158(17) 0.0177(17) 0.0095(14) -0.0021(14) -0.0009(14)
    O3 0.038(2) 0.027(2) 0.023(2) -0.0074(17) 0.0050(17) -0.0053(16)
    O4 0.0214(19) 0.026(2) 0.039(2) -0.0051(16) 0.0062(17) 0.0080(17)
    O5 0.0222(19) 0.0208(18) 0.029(2) -0.0027(15) -0.0075(15) 0.0031(15)
    O6 0.0193(19) 0.039(2) 0.038(2) 0.0107(17) 0.0004(17) 0.0074(19)
    O7 0.0123(16) 0.0228(18) 0.0229(18) -0.0035(14) 0.0008(14) -0.0013(14)
    O8 0.045(2) 0.026(2) 0.0187(19) -0.0071(18) 0.0041(17) -0.0083(16)
    O9 0.029(2) 0.0158(17) 0.0224(19) 0.0086(15) 0.0039(15) -0.0017(14)
    O10 0.0213(19) 0.027(2) 0.032(2) -0.0047(15) 0.0043(16) 0.0062(16)
    O11 0.0189(19) 0.038(2) 0.037(2) 0.0059(16) 0.0003(17) 0.0013(18)
    O12 0.0162(18) 0.0208(18) 0.036(2) -0.0011(14) 0.0002(15) 0.0016(16)
    O13 0.0149(17) 0.035(2) 0.027(2) -0.0006(15) 0.0042(15) -0.0041(16)
    O14 0.0238(19) 0.0222(19) 0.038(2) -0.0062(15) 0.0021(17) 0.0062(17)
    O15 0.043(2) 0.032(2) 0.029(2) -0.0092(19) -0.0006(18) -0.0080(17)
    O16 0.050(3) 0.030(2) 0.034(2) 0.0042(19) 0.006(2) 0.0066(18)
    O17 0.022(2) 0.042(3) 0.058(3) -0.0082(18) 0.0006(19) 0.001(2)
    O18 0.034(3) 0.024(2) 0.177(6) 0.001(2) 0.051(3) -0.009(3)
    N1 0.0132(19) 0.017(2) 0.0099(18) -0.0001(15) 0.0025(15) -0.0007(15)
    N2 0.0141(19) 0.0160(19) 0.0123(19) 0.0006(15) 0.0021(15) -0.0006(15)
    N3 0.018(2) 0.017(2) 0.0121(19) -0.0001(16) 0.0017(16) -0.0005(16)
    N4 0.0120(19) 0.0153(19) 0.013(2) 0.0015(15) 0.0006(15) -0.0049(15)
    N5 0.015(2) 0.018(2) 0.016(2) 0.0024(16) -0.0006(16) 0.0001(16)
    N6 0.0130(19) 0.019(2) 0.016(2) 0.0002(16) 0.0023(16) -0.0030(16)
    N7 0.020(2) 0.0119(19) 0.016(2) 0.0005(15) 0.0045(16) -0.0014(15)
    N8 0.018(2) 0.015(2) 0.022(2) -0.0007(16) 0.0052(17) -0.0019(17)
    N9 0.013(2) 0.015(2) 0.025(2) 0.0011(15) 0.0021(17) 0.0012(17)
    N10 0.022(2) 0.023(2) 0.022(2) -0.0006(17) 0.0062(18) 0.0010(18)
    N11 0.0137(19) 0.020(2) 0.016(2) -0.0022(16) 0.0029(16) 0.0028(16)
    N12 0.015(2) 0.021(2) 0.024(2) 0.0025(16) 0.0036(17) 0.0023(18)
    C1 0.013(2) 0.015(2) 0.016(2) 0.0013(17) 0.0063(18) -0.0023(18)
    C2 0.012(2) 0.014(2) 0.013(2) -0.0019(17) 0.0036(18) 0.0000(17)
    C3 0.016(2) 0.014(2) 0.010(2) 0.0033(18) -0.0004(18) 0.0016(17)
    C4 0.018(2) 0.013(2) 0.018(2) 0.0023(19) -0.0012(19) -0.0010(19)
    C5 0.016(2) 0.011(2) 0.018(2) -0.0020(18) 0.0040(19) -0.0056(18)
    C6 0.019(2) 0.020(2) 0.017(2) 0.004(2) -0.002(2) -0.001(2)
    C7 0.010(2) 0.022(3) 0.019(2) -0.0013(18) -0.0002(19) -0.001(2)
    C8 0.013(2) 0.018(2) 0.022(3) -0.0007(18) 0.0086(19) -0.003(2)
    C9 0.022(3) 0.021(2) 0.017(2) 0.007(2) 0.006(2) -0.005(2)
    C10 0.021(2) 0.017(2) 0.014(2) 0.0041(19) 0.006(2) -0.0017(18)
    C11 0.022(3) 0.018(2) 0.016(2) 0.001(2) 0.001(2) 0.0028(19)
    C12 0.015(2) 0.030(3) 0.033(3) 0.002(2) 0.013(2) -0.008(2)
    C13 0.032(3) 0.022(3) 0.017(3) -0.002(2) 0.006(2) -0.002(2)
    C14 0.016(2) 0.025(3) 0.020(3) 0.000(2) -0.005(2) 0.001(2)
    C15 0.024(3) 0.014(2) 0.012(2) -0.0020(19) 0.0021(19) -0.0056(18)
    C16 0.032(3) 0.027(3) 0.016(3) -0.001(2) 0.003(2) 0.004(2)
    C17 0.020(3) 0.023(3) 0.025(3) -0.003(2) 0.013(2) -0.004(2)
    C18 0.033(3) 0.028(3) 0.010(2) 0.000(2) -0.003(2) 0.004(2)
    C19 0.029(3) 0.030(3) 0.016(3) 0.003(2) -0.010(2) 0.005(2)
    C20 0.033(3) 0.029(3) 0.042(4) -0.004(2) 0.022(3) 0.003(3)
    C21 0.033(3) 0.035(3) 0.031(3) -0.005(3) 0.017(3) -0.008(3)
    C22 0.050(4) 0.025(3) 0.049(4) 0.000(3) 0.034(3) 0.004(3)
    C23 0.013(2) 0.023(3) 0.048(4) 0.000(2) 0.007(2) -0.017(2)
    C24 0.037(3) 0.026(3) 0.036(3) 0.012(3) 0.011(3) 0.001(3)
    C25 0.055(4) 0.055(4) 0.023(3) 0.032(3) 0.016(3) -0.003(3)
    C26 0.022(3) 0.041(3) 0.039(3) -0.011(2) 0.014(3) -0.005(3)
    C27 0.020(2) 0.011(2) 0.028(3) 0.0009(19) 0.009(2) -0.0008(19)
    C28 0.019(2) 0.023(3) 0.022(3) 0.000(2) 0.008(2) 0.003(2)
    C29 0.013(2) 0.013(2) 0.021(3) 0.0043(17) 0.0020(19) 0.0018(19)
    C30 0.016(2) 0.016(2) 0.019(2) -0.0018(19) 0.0024(19) -0.0028(19)
    C31 0.022(3) 0.012(2) 0.024(3) -0.0025(19) 0.006(2) -0.0035(19)
    C32 0.012(2) 0.020(2) 0.024(3) 0.0009(19) 0.002(2) -0.004(2)
    C33 0.039(3) 0.019(3) 0.019(3) 0.000(2) 0.009(2) -0.008(2)
    C34 0.014(2) 0.018(2) 0.018(2) -0.0003(18) 0.0042(19) -0.0001(19)
    C35 0.020(3) 0.019(2) 0.022(3) 0.005(2) -0.004(2) 0.000(2)
    C36 0.027(3) 0.019(2) 0.021(3) 0.005(2) 0.007(2) -0.004(2)
    C37 0.018(2) 0.018(2) 0.016(2) 0.0046(19) 0.0045(19) 0.0011(19)
    C38 0.019(3) 0.026(3) 0.031(3) 0.003(2) 0.011(2) -0.007(2)
    C39 0.016(2) 0.020(2) 0.021(3) 0.0066(19) 0.003(2) -0.002(2)
    C40 0.030(3) 0.028(3) 0.030(3) -0.002(2) 0.014(2) 0.001(2)
    C41 0.031(3) 0.022(3) 0.030(3) 0.009(2) 0.004(2) -0.002(2)
    C42 0.037(3) 0.027(3) 0.011(2) 0.003(2) -0.002(2) 0.001(2)
    C43 0.023(3) 0.019(2) 0.021(3) -0.001(2) 0.007(2) 0.000(2)
    C44 0.015(2) 0.039(3) 0.022(3) -0.001(2) -0.003(2) 0.001(2)
    C45 0.025(3) 0.029(3) 0.023(3) -0.001(2) 0.005(2) 0.005(2)
    C46 0.019(3) 0.023(3) 0.049(4) 0.003(2) 0.013(2) -0.012(3)
    C47 0.034(3) 0.036(3) 0.019(3) 0.002(3) 0.001(2) 0.006(2)
    C48 0.043(3) 0.040(3) 0.018(3) 0.015(3) 0.010(2) -0.001(2)
    C49 0.047(4) 0.033(3) 0.053(4) -0.008(3) 0.040(3) -0.008(3)
    C50 0.024(3) 0.022(3) 0.032(3) 0.005(2) 0.013(2) 0.007(2)
    C51 0.025(3) 0.024(3) 0.025(3) -0.001(2) 0.005(2) -0.003(2)
    C52 0.019(2) 0.023(3) 0.022(3) -0.004(2) 0.004(2) -0.003(2)
    C53 0.020(2) 0.018(2) 0.020(3) 0.0008(19) 0.003(2) 0.0015(19)
    C54 0.019(2) 0.016(2) 0.025(3) -0.001(2) -0.002(2) 0.004(2)
    C55 0.022(3) 0.018(2) 0.022(3) 0.004(2) 0.006(2) 0.004(2)
    C56 0.009(2) 0.024(3) 0.033(3) -0.0012(19) 0.000(2) 0.000(2)
    C57 0.021(3) 0.021(3) 0.022(3) 0.003(2) 0.008(2) 0.006(2)
    C58 0.020(2) 0.014(2) 0.024(3) 0.0001(19) 0.007(2) 0.0037(19)
    C59 0.030(3) 0.021(3) 0.026(3) 0.007(2) 0.010(2) 0.009(2)
    C60 0.016(2) 0.020(3) 0.024(3) -0.0005(19) 0.001(2) 0.002(2)
    C61 0.028(3) 0.030(3) 0.021(3) -0.004(2) 0.001(2) -0.003(2)
    C62 0.019(3) 0.028(3) 0.035(3) 0.000(2) -0.004(2) -0.001(2)
    C63 0.039(3) 0.028(3) 0.024(3) -0.001(3) 0.001(2) -0.008(2)
    C64 0.020(3) 0.035(3) 0.041(3) -0.005(2) 0.013(2) 0.002(3)
    C65 0.021(3) 0.028(3) 0.026(3) -0.008(2) 0.007(2) 0.002(2)
    C66 0.047(4) 0.030(3) 0.051(4) 0.001(3) 0.027(3) -0.003(3)
    C67 0.033(3) 0.039(3) 0.021(3) 0.002(3) -0.003(2) 0.000(2)
    C68 0.041(3) 0.034(3) 0.024(3) 0.001(3) 0.005(3) 0.009(2)
    C69 0.019(3) 0.029(3) 0.048(4) -0.004(2) 0.004(2) 0.013(3)
    C70 0.034(3) 0.031(3) 0.050(4) 0.000(3) 0.013(3) 0.003(3)
    C71 0.037(3) 0.029(3) 0.027(3) -0.004(3) -0.012(3) -0.002(2)
    C72 0.038(3) 0.036(3) 0.042(4) 0.008(3) 0.024(3) 0.014(3)
    C73 0.033(3) 0.043(4) 0.053(4) -0.017(3) -0.003(3) 0.024(3)
    C74 0.044(4) 0.057(4) 0.037(4) -0.025(3) 0.017(3) 0.003(3)
    C75 0.022(3) 0.048(4) 0.047(4) 0.007(3) 0.018(3) 0.003(3)
    C76 0.039(4) 0.099(6) 0.032(4) 0.005(4) 0.022(3) 0.018(4)
    C77 0.036(4) 0.059(4) 0.056(4) 0.006(3) 0.023(3) 0.000(4)
    C78 0.050(4) 0.048(4) 0.069(5) -0.014(3) 0.034(4) -0.006(4)

_geom_special_details                   
;
All esds (except the esd in the dihedral angle between two l.s. planes)
are estimated using the full covariance matrix.  The cell esds are taken
into account individually in the estimation of esds in distances, angles
and torsion angles; correlations between esds in cell parameters are only
used when they are defined by crystal symmetry.  An approximate (isotropic)
treatment of cell esds is used for estimating esds involving l.s. planes.
;

loop_
    _geom_bond_atom_site_label_1
    _geom_bond_atom_site_label_2
    _geom_bond_site_symmetry_2
    _geom_bond_distance
    _geom_bond_publ_flag
    Fe1 O2 . 2.109(3) ?
    Fe1 O1 . 2.119(3) ?
    Fe1 N2 . 2.161(4) ?
    Fe1 N3 . 2.160(4) ?
    Fe1 N1 . 2.254(4) ?
    Fe1 N4 . 2.258(4) ?
    Fe2 O9 . 2.111(3) ?
    Fe2 O7 . 2.122(3) ?
    Fe2 N7 . 2.141(4) ?
    Fe2 N5 . 2.161(4) ?
    Fe2 N8 . 2.250(4) ?
    Fe2 N6 . 2.259(4) ?
    Fe3 O14 . 2.111(4) ?
    Fe3 O13 . 2.126(4) ?
    Fe3 N10 . 2.160(4) ?
    Fe3 N12 . 2.168(4) ?
    Fe3 N11 . 2.246(4) ?
    Fe3 N9 . 2.274(4) ?
    S1 O4 . 1.431(4) ?
    S1 O5 . 1.432(3) ?
    S1 O2 . 1.467(3) ?
    S1 C24 . 1.813(6) ?
    S2 O6 . 1.435(4) ?
    S2 O3 . 1.436(4) ?
    S2 O1 . 1.467(3) ?
    S2 C20 . 1.821(6) ?
    S3 O8 . 1.424(4) ?
    S3 O11 . 1.436(4) ?
    S3 O7 . 1.460(3) ?
    S3 C40 . 1.826(6) ?
    S4 O12 . 1.438(4) ?
    S4 O10 . 1.438(4) ?
    S4 O9 . 1.465(3) ?
    S4 C41 . 1.818(6) ?
    S5 O18 . 1.416(4) ?
    S5 O15 . 1.428(4) ?
    S5 O14 . 1.467(4) ?
    S5 C73 . 1.843(7) ?
    S6 O16 . 1.413(4) ?
    S6 O17 . 1.437(4) ?
    S6 O13 . 1.467(4) ?
    S6 C70 . 1.828(7) ?
    F1 C24 . 1.326(6) ?
    F2 C20 . 1.340(6) ?
    F3 C24 . 1.339(7) ?
    F4 C24 . 1.329(7) ?
    F5 C20 . 1.329(7) ?
    F6 C20 . 1.344(7) ?
    F7 C40 . 1.336(6) ?
    F8 C41 . 1.325(6) ?
    F9 C41 . 1.341(6) ?
    F10 C41 . 1.328(7) ?
    F11 C40 . 1.330(6) ?
    F12 C40 . 1.329(6) ?
    F13 C73 . 1.352(7) ?
    F14 C70 . 1.356(7) ?
    F15 C70 . 1.340(7) ?
    F16 C73 . 1.357(8) ?
    F17 C70 . 1.316(7) ?
    F18 C73 . 1.296(7) ?
    N1 C3 . 1.483(5) ?
    N1 C1 . 1.498(6) ?
    N1 C10 . 1.496(6) ?
    N2 C2 . 1.345(6) ?
    N2 C15 . 1.342(6) ?
    N3 C4 . 1.340(6) ?
    N3 C11 . 1.353(6) ?
    N4 C8 . 1.494(6) ?
    N4 C5 . 1.492(5) ?
    N4 C7 . 1.484(6) ?
    N5 C30 . 1.341(6) ?
    N5 C43 . 1.351(6) ?
    N6 C29 . 1.485(6) ?
    N6 C27 . 1.489(6) ?
    N6 C37 . 1.495(6) ?
    N7 C36 . 1.350(6) ?
    N7 C34 . 1.353(6) ?
    N8 C28 . 1.480(6) ?
    N8 C32 . 1.490(6) ?
    N8 C31 . 1.492(6) ?
    N9 C56 . 1.485(6) ?
    N9 C57 . 1.483(6) ?
    N9 C58 . 1.496(6) ?
    N10 C51 . 1.351(7) ?
    N10 C54 . 1.348(6) ?
    N11 C52 . 1.477(6) ?
    N11 C53 . 1.492(6) ?
    N11 C60 . 1.505(6) ?
    N12 C59 . 1.343(6) ?
    N12 C55 . 1.356(6) ?
    C1 C5 . 1.515(6) ?
    C1 H1A . 0.97 ?
    C1 H1B . 0.97 ?
    C2 C6 . 1.400(6) ?
    C2 C3 . 1.504(6) ?
    C3 H3A . 0.97 ?
    C3 H3B . 0.97 ?
    C4 C14 . 1.405(6) ?
    C4 C7 . 1.506(7) ?
    C5 H5A . 0.97 ?
    C5 H5B . 0.97 ?
    C6 C18 . 1.392(7) ?
    C6 H6 . 0.93 ?
    C7 H7A . 0.97 ?
    C7 H7B . 0.97 ?
    C8 C17 . 1.556(6) ?
    C8 H8A . 0.97 ?
    C8 H8B . 0.97 ?
    C9 C23 . 1.521(7) ?
    C9 C25 . 1.542(7) ?
    C9 C12 . 1.533(7) ?
    C9 C10 . 1.555(6) ?
    C10 H10A . 0.97 ?
    C10 H10B . 0.97 ?
    C11 C16 . 1.379(7) ?
    C11 H11 . 0.93 ?
    C12 H12A . 0.96 ?
    C12 H12B . 0.96 ?
    C12 H12C . 0.96 ?
    C13 C15 . 1.383(7) ?
    C13 C18 . 1.390(7) ?
    C13 H13 . 0.93 ?
    C14 C19 . 1.370(7) ?
    C14 H14 . 0.93 ?
    C15 H15 . 0.93 ?
    C16 C19 . 1.389(7) ?
    C16 H16 . 0.93 ?
    C17 C22 . 1.529(7) ?
    C17 C21 . 1.535(7) ?
    C17 C26 . 1.535(7) ?
    C18 H18 . 0.93 ?
    C19 H19 . 0.93 ?
    C21 H21A . 0.96 ?
    C21 H21B . 0.96 ?
    C21 H21C . 0.96 ?
    C22 H22A . 0.96 ?
    C22 H22B . 0.96 ?
    C22 H22C . 0.96 ?
    C23 H23A . 0.96 ?
    C23 H23B . 0.96 ?
    C23 H23C . 0.96 ?
    C25 H25A . 0.96 ?
    C25 H25B . 0.96 ?
    C25 H25C . 0.96 ?
    C26 H26A . 0.96 ?
    C26 H26B . 0.96 ?
    C26 H26C . 0.96 ?
    C27 C31 . 1.527(7) ?
    C27 H27A . 0.97 ?
    C27 H27B . 0.97 ?
    C28 C49 . 1.556(7) ?
    C28 H28A . 0.97 ?
    C28 H28B . 0.97 ?
    C29 C34 . 1.506(6) ?
    C29 H29A . 0.97 ?
    C29 H29B . 0.97 ?
    C30 C44 . 1.405(7) ?
    C30 C32 . 1.506(7) ?
    C31 H31A . 0.97 ?
    C31 H31B . 0.97 ?
    C32 H32A . 0.97 ?
    C32 H32B . 0.97 ?
    C33 C36 . 1.387(7) ?
    C33 C42 . 1.386(7) ?
    C33 H33 . 0.93 ?
    C34 C35 . 1.391(7) ?
    C35 C42 . 1.380(7) ?
    C35 H35 . 0.93 ?
    C36 H36 . 0.93 ?
    C37 C39 . 1.553(6) ?
    C37 H37A . 0.97 ?
    C37 H37B . 0.97 ?
    C38 C39 . 1.530(7) ?
    C38 H38A . 0.96 ?
    C38 H38B . 0.96 ?
    C38 H38C . 0.96 ?
    C39 C46 . 1.526(7) ?
    C39 C48 . 1.540(7) ?
    C42 H42 . 0.93 ?
    C43 C45 . 1.379(7) ?
    C43 H43 . 0.93 ?
    C44 C47 . 1.376(8) ?
    C44 H44 . 0.93 ?
    C45 C47 . 1.400(7) ?
    C45 H45 . 0.93 ?
    C46 H46A . 0.96 ?
    C46 H46B . 0.96 ?
    C46 H46C . 0.96 ?
    C47 H47 . 0.93 ?
    C48 H48A . 0.96 ?
    C48 H48B . 0.96 ?
    C48 H48C . 0.96 ?
    C49 C76 . 1.499(9) ?
    C49 C78 . 1.513(9) ?
    C49 C77 . 1.576(9) ?
    C50 C72 . 1.532(7) ?
    C50 C57 . 1.548(7) ?
    C50 C75 . 1.538(8) ?
    C50 C66 . 1.541(8) ?
    C51 C63 . 1.387(7) ?
    C51 H51 . 0.93 ?
    C52 C65 . 1.549(7) ?
    C52 H52A . 0.97 ?
    C52 H52B . 0.97 ?
    C53 C58 . 1.527(6) ?
    C53 H53A . 0.97 ?
    C53 H53B . 0.97 ?
    C54 C62 . 1.392(7) ?
    C54 C56 . 1.497(7) ?
    C55 C61 . 1.387(7) ?
    C55 C60 . 1.496(7) ?
    C56 H56A . 0.97 ?
    C56 H56B . 0.97 ?
    C57 H57A . 0.97 ?
    C57 H57B . 0.97 ?
    C58 H58A . 0.97 ?
    C58 H58B . 0.97 ?
    C59 C68 . 1.374(8) ?
    C59 H59 . 0.93 ?
    C60 H60A . 0.97 ?
    C60 H60B . 0.97 ?
    C61 C67 . 1.386(8) ?
    C61 H61 . 0.93 ?
    C62 C71 . 1.385(8) ?
    C62 H62 . 0.93 ?
    C63 C71 . 1.391(8) ?
    C63 H63 . 0.93 ?
    C64 C65 . 1.538(7) ?
    C64 H64A . 0.96 ?
    C64 H64B . 0.96 ?
    C64 H64C . 0.96 ?
    C65 C74 . 1.541(8) ?
    C65 C69 . 1.543(8) ?
    C66 H66A . 0.96 ?
    C66 H66B . 0.96 ?
    C66 H66C . 0.96 ?
    C67 C68 . 1.391(8) ?
    C67 H67 . 0.93 ?
    C68 H68 . 0.93 ?
    C69 H69A . 0.96 ?
    C69 H69B . 0.96 ?
    C69 H69C . 0.96 ?
    C71 H71 . 0.93 ?
    C72 H72A . 0.96 ?
    C72 H72B . 0.96 ?
    C72 H72C . 0.96 ?
    C74 H74A . 0.96 ?
    C74 H74B . 0.96 ?
    C74 H74C . 0.96 ?
    C75 H75A . 0.96 ?
    C75 H75B . 0.96 ?
    C75 H75C . 0.96 ?
    C76 H76A . 0.96 ?
    C76 H76B . 0.96 ?
    C76 H76C . 0.96 ?
    C77 H77A . 0.96 ?
    C77 H77B . 0.96 ?
    C77 H77C . 0.96 ?
    C78 H78A . 0.96 ?
    C78 H78B . 0.96 ?
    C78 H78C . 0.96 ?

loop_
    _geom_angle_atom_site_label_1
    _geom_angle_atom_site_label_2
    _geom_angle_atom_site_label_3
    _geom_angle_site_symmetry_1
    _geom_angle_site_symmetry_3
    _geom_angle
    _geom_angle_publ_flag
    O2 Fe1 O1 . . 94.67(14) ?
    O2 Fe1 N2 . . 88.57(13) ?
    O1 Fe1 N2 . . 92.20(14) ?
    O2 Fe1 N3 . . 92.61(13) ?
    O1 Fe1 N3 . . 90.79(14) ?
    N2 Fe1 N3 . . 176.68(15) ?
    O2 Fe1 N1 . . 164.60(13) ?
    O1 Fe1 N1 . . 90.99(13) ?
    N2 Fe1 N1 . . 76.89(14) ?
    N3 Fe1 N1 . . 101.63(14) ?
    O2 Fe1 N4 . . 95.00(14) ?
    O1 Fe1 N4 . . 164.55(13) ?
    N2 Fe1 N4 . . 100.05(14) ?
    N3 Fe1 N4 . . 76.76(14) ?
    N1 Fe1 N4 . . 82.75(14) ?
    O9 Fe2 O7 . . 94.84(14) ?
    O9 Fe2 N7 . . 88.33(14) ?
    O7 Fe2 N7 . . 93.34(14) ?
    O9 Fe2 N5 . . 92.98(14) ?
    O7 Fe2 N5 . . 90.40(14) ?
    N7 Fe2 N5 . . 175.92(15) ?
    O9 Fe2 N8 . . 94.96(14) ?
    O7 Fe2 N8 . . 164.66(14) ?
    N7 Fe2 N8 . . 98.71(15) ?
    N5 Fe2 N8 . . 77.33(15) ?
    O9 Fe2 N6 . . 164.35(14) ?
    O7 Fe2 N6 . . 90.82(14) ?
    N7 Fe2 N6 . . 76.76(14) ?
    N5 Fe2 N6 . . 101.58(14) ?
    N8 Fe2 N6 . . 82.80(14) ?
    O14 Fe3 O13 . . 95.61(15) ?
    O14 Fe3 N10 . . 93.93(15) ?
    O13 Fe3 N10 . . 88.94(15) ?
    O14 Fe3 N12 . . 87.02(15) ?
    O13 Fe3 N12 . . 95.38(15) ?
    N10 Fe3 N12 . . 175.47(16) ?
    O14 Fe3 N11 . . 163.04(15) ?
    O13 Fe3 N11 . . 92.20(14) ?
    N10 Fe3 N11 . . 101.26(15) ?
    N12 Fe3 N11 . . 77.26(15) ?
    O14 Fe3 N9 . . 93.21(15) ?
    O13 Fe3 N9 . . 163.77(15) ?
    N10 Fe3 N9 . . 76.86(15) ?
    N12 Fe3 N9 . . 98.67(15) ?
    N11 Fe3 N9 . . 83.05(14) ?
    O4 S1 O5 . . 116.1(2) ?
    O4 S1 O2 . . 115.1(2) ?
    O5 S1 O2 . . 114.1(2) ?
    O4 S1 C24 . . 104.2(3) ?
    O5 S1 C24 . . 103.8(3) ?
    O2 S1 C24 . . 101.0(2) ?
    O6 S2 O3 . . 117.2(2) ?
    O6 S2 O1 . . 113.4(2) ?
    O3 S2 O1 . . 114.6(2) ?
    O6 S2 C20 . . 103.9(3) ?
    O3 S2 C20 . . 104.6(3) ?
    O1 S2 C20 . . 100.5(2) ?
    O8 S3 O11 . . 116.7(2) ?
    O8 S3 O7 . . 114.9(2) ?
    O11 S3 O7 . . 113.4(2) ?
    O8 S3 C40 . . 105.1(2) ?
    O11 S3 C40 . . 103.7(3) ?
    O7 S3 C40 . . 100.6(2) ?
    O12 S4 O10 . . 116.5(2) ?
    O12 S4 O9 . . 113.9(2) ?
    O10 S4 O9 . . 114.7(2) ?
    O12 S4 C41 . . 103.4(2) ?
    O10 S4 C41 . . 105.1(2) ?
    O9 S4 C41 . . 100.7(2) ?
    O18 S5 O15 . . 117.6(3) ?
    O18 S5 O14 . . 114.3(3) ?
    O15 S5 O14 . . 113.7(2) ?
    O18 S5 C73 . . 104.9(3) ?
    O15 S5 C73 . . 103.0(3) ?
    O14 S5 C73 . . 100.4(3) ?
    O16 S6 O17 . . 117.0(3) ?
    O16 S6 O13 . . 115.2(2) ?
    O17 S6 O13 . . 113.6(2) ?
    O16 S6 C70 . . 105.2(3) ?
    O17 S6 C70 . . 102.4(3) ?
    O13 S6 C70 . . 100.6(2) ?
    S2 O1 Fe1 . . 139.1(2) ?
    S1 O2 Fe1 . . 138.1(2) ?
    S3 O7 Fe2 . . 141.4(2) ?
    S4 O9 Fe2 . . 137.2(2) ?
    S6 O13 Fe3 . . 151.2(2) ?
    S5 O14 Fe3 . . 138.4(2) ?
    C3 N1 C1 . . 111.1(3) ?
    C3 N1 C10 . . 113.9(3) ?
    C1 N1 C10 . . 114.2(3) ?
    C3 N1 Fe1 . . 105.6(3) ?
    C1 N1 Fe1 . . 104.1(3) ?
    C10 N1 Fe1 . . 106.9(3) ?
    C2 N2 C15 . . 119.0(4) ?
    C2 N2 Fe1 . . 115.4(3) ?
    C15 N2 Fe1 . . 125.4(3) ?
    C4 N3 C11 . . 118.7(4) ?
    C4 N3 Fe1 . . 116.0(3) ?
    C11 N3 Fe1 . . 125.3(3) ?
    C8 N4 C5 . . 114.8(4) ?
    C8 N4 C7 . . 113.3(4) ?
    C5 N4 C7 . . 109.8(3) ?
    C8 N4 Fe1 . . 108.1(3) ?
    C5 N4 Fe1 . . 103.0(3) ?
    C7 N4 Fe1 . . 107.0(3) ?
    C30 N5 C43 . . 118.4(4) ?
    C30 N5 Fe2 . . 115.6(3) ?
    C43 N5 Fe2 . . 125.9(3) ?
    C29 N6 C27 . . 110.7(4) ?
    C29 N6 C37 . . 113.9(4) ?
    C27 N6 C37 . . 115.2(4) ?
    C29 N6 Fe2 . . 105.7(3) ?
    C27 N6 Fe2 . . 104.0(3) ?
    C37 N6 Fe2 . . 106.3(3) ?
    C36 N7 C34 . . 118.4(4) ?
    C36 N7 Fe2 . . 125.4(3) ?
    C34 N7 Fe2 . . 116.1(3) ?
    C28 N8 C32 . . 113.2(4) ?
    C28 N8 C31 . . 114.0(4) ?
    C32 N8 C31 . . 109.9(4) ?
    C28 N8 Fe2 . . 109.8(3) ?
    C32 N8 Fe2 . . 105.8(3) ?
    C31 N8 Fe2 . . 103.4(3) ?
    C56 N9 C57 . . 113.9(4) ?
    C56 N9 C58 . . 109.0(4) ?
    C57 N9 C58 . . 116.2(4) ?
    C56 N9 Fe3 . . 106.0(3) ?
    C57 N9 Fe3 . . 109.1(3) ?
    C58 N9 Fe3 . . 101.5(3) ?
    C51 N10 C54 . . 117.8(4) ?
    C51 N10 Fe3 . . 126.2(3) ?
    C54 N10 Fe3 . . 115.8(3) ?
    C52 N11 C53 . . 113.4(4) ?
    C52 N11 C60 . . 112.9(4) ?
    C53 N11 C60 . . 110.7(4) ?
    C52 N11 Fe3 . . 109.6(3) ?
    C53 N11 Fe3 . . 104.3(3) ?
    C60 N11 Fe3 . . 105.3(3) ?
    C59 N12 C55 . . 117.9(4) ?
    C59 N12 Fe3 . . 126.8(3) ?
    C55 N12 Fe3 . . 114.6(3) ?
    N1 C1 C5 . . 111.0(4) ?
    N1 C1 H1A . . 109.4 ?
    C5 C1 H1A . . 109.4 ?
    N1 C1 H1B . . 109.4 ?
    C5 C1 H1B . . 109.4 ?
    H1A C1 H1B . . 108.0 ?
    N2 C2 C6 . . 121.9(4) ?
    N2 C2 C3 . . 116.6(4) ?
    C6 C2 C3 . . 121.4(4) ?
    N1 C3 C2 . . 110.9(4) ?
    N1 C3 H3A . . 109.5 ?
    C2 C3 H3A . . 109.5 ?
    N1 C3 H3B . . 109.5 ?
    C2 C3 H3B . . 109.5 ?
    H3A C3 H3B . . 108.0 ?
    N3 C4 C14 . . 121.6(5) ?
    N3 C4 C7 . . 117.5(4) ?
    C14 C4 C7 . . 120.9(4) ?
    N4 C5 C1 . . 112.6(4) ?
    N4 C5 H5A . . 109.1 ?
    C1 C5 H5A . . 109.1 ?
    N4 C5 H5B . . 109.1 ?
    C1 C5 H5B . . 109.1 ?
    H5A C5 H5B . . 107.8 ?
    C18 C6 C2 . . 118.7(4) ?
    C18 C6 H6 . . 120.7 ?
    C2 C6 H6 . . 120.7 ?
    N4 C7 C4 . . 112.1(4) ?
    N4 C7 H7A . . 109.2 ?
    C4 C7 H7A . . 109.2 ?
    N4 C7 H7B . . 109.2 ?
    C4 C7 H7B . . 109.2 ?
    H7A C7 H7B . . 107.9 ?
    N4 C8 C17 . . 124.1(4) ?
    N4 C8 H8A . . 106.3 ?
    C17 C8 H8A . . 106.3 ?
    N4 C8 H8B . . 106.3 ?
    C17 C8 H8B . . 106.3 ?
    H8A C8 H8B . . 106.4 ?
    C23 C9 C25 . . 108.4(5) ?
    C23 C9 C12 . . 109.1(4) ?
    C25 C9 C12 . . 108.3(4) ?
    C23 C9 C10 . . 114.4(4) ?
    C25 C9 C10 . . 103.0(4) ?
    C12 C9 C10 . . 113.3(4) ?
    N1 C10 C9 . . 123.2(4) ?
    N1 C10 H10A . . 106.5 ?
    C9 C10 H10A . . 106.5 ?
    N1 C10 H10B . . 106.5 ?
    C9 C10 H10B . . 106.5 ?
    H10A C10 H10B . . 106.5 ?
    N3 C11 C16 . . 122.2(5) ?
    N3 C11 H11 . . 118.9 ?
    C16 C11 H11 . . 118.9 ?
    C9 C12 H12A . . 109.5 ?
    C9 C12 H12B . . 109.5 ?
    H12A C12 H12B . . 109.5 ?
    C9 C12 H12C . . 109.5 ?
    H12A C12 H12C . . 109.5 ?
    H12B C12 H12C . . 109.5 ?
    C15 C13 C18 . . 119.0(5) ?
    C15 C13 H13 . . 120.5 ?
    C18 C13 H13 . . 120.5 ?
    C19 C14 C4 . . 119.4(5) ?
    C19 C14 H14 . . 120.3 ?
    C4 C14 H14 . . 120.3 ?
    N2 C15 C13 . . 122.5(4) ?
    N2 C15 H15 . . 118.7 ?
    C13 C15 H15 . . 118.7 ?
    C11 C16 C19 . . 119.2(5) ?
    C11 C16 H16 . . 120.4 ?
    C19 C16 H16 . . 120.4 ?
    C22 C17 C21 . . 106.6(4) ?
    C22 C17 C26 . . 109.9(5) ?
    C21 C17 C26 . . 109.2(4) ?
    C22 C17 C8 . . 112.2(4) ?
    C21 C17 C8 . . 104.4(4) ?
    C26 C17 C8 . . 114.1(4) ?
    C6 C18 C13 . . 118.9(5) ?
    C6 C18 H18 . . 120.5 ?
    C13 C18 H18 . . 120.5 ?
    C14 C19 C16 . . 118.9(5) ?
    C14 C19 H19 . . 120.5 ?
    C16 C19 H19 . . 120.5 ?
    F5 C20 F2 . . 107.6(5) ?
    F5 C20 F6 . . 108.4(5) ?
    F2 C20 F6 . . 107.2(5) ?
    F5 C20 S2 . . 111.2(4) ?
    F2 C20 S2 . . 111.9(4) ?
    F6 C20 S2 . . 110.3(4) ?
    C17 C21 H21A . . 109.5 ?
    C17 C21 H21B . . 109.5 ?
    H21A C21 H21B . . 109.5 ?
    C17 C21 H21C . . 109.5 ?
    H21A C21 H21C . . 109.5 ?
    H21B C21 H21C . . 109.5 ?
    C17 C22 H22A . . 109.5 ?
    C17 C22 H22B . . 109.5 ?
    H22A C22 H22B . . 109.5 ?
    C17 C22 H22C . . 109.5 ?
    H22A C22 H22C . . 109.5 ?
    H22B C22 H22C . . 109.5 ?
    C9 C23 H23A . . 109.5 ?
    C9 C23 H23B . . 109.5 ?
    H23A C23 H23B . . 109.5 ?
    C9 C23 H23C . . 109.5 ?
    H23A C23 H23C . . 109.5 ?
    H23B C23 H23C . . 109.5 ?
    F1 C24 F4 . . 107.1(5) ?
    F1 C24 F3 . . 108.5(5) ?
    F4 C24 F3 . . 107.3(5) ?
    F1 C24 S1 . . 111.8(4) ?
    F4 C24 S1 . . 111.1(4) ?
    F3 C24 S1 . . 110.9(4) ?
    C9 C25 H25A . . 109.5 ?
    C9 C25 H25B . . 109.5 ?
    H25A C25 H25B . . 109.5 ?
    C9 C25 H25C . . 109.5 ?
    H25A C25 H25C . . 109.5 ?
    H25B C25 H25C . . 109.5 ?
    C17 C26 H26A . . 109.5 ?
    C17 C26 H26B . . 109.5 ?
    H26A C26 H26B . . 109.5 ?
    C17 C26 H26C . . 109.5 ?
    H26A C26 H26C . . 109.5 ?
    H26B C26 H26C . . 109.5 ?
    N6 C27 C31 . . 111.4(4) ?
    N6 C27 H27A . . 109.3 ?
    C31 C27 H27A . . 109.3 ?
    N6 C27 H27B . . 109.3 ?
    C31 C27 H27B . . 109.3 ?
    H27A C27 H27B . . 108.0 ?
    N8 C28 C49 . . 123.3(4) ?
    N8 C28 H28A . . 106.5 ?
    C49 C28 H28A . . 106.5 ?
    N8 C28 H28B . . 106.5 ?
    C49 C28 H28B . . 106.5 ?
    H28A C28 H28B . . 106.5 ?
    N6 C29 C34 . . 111.0(4) ?
    N6 C29 H29A . . 109.4 ?
    C34 C29 H29A . . 109.4 ?
    N6 C29 H29B . . 109.4 ?
    C34 C29 H29B . . 109.4 ?
    H29A C29 H29B . . 108.0 ?
    N5 C30 C44 . . 121.9(5) ?
    N5 C30 C32 . . 116.8(4) ?
    C44 C30 C32 . . 121.3(4) ?
    N8 C31 C27 . . 111.8(4) ?
    N8 C31 H31A . . 109.3 ?
    C27 C31 H31A . . 109.3 ?
    N8 C31 H31B . . 109.3 ?
    C27 C31 H31B . . 109.3 ?
    H31A C31 H31B . . 107.9 ?
    N8 C32 C30 . . 111.8(4) ?
    N8 C32 H32A . . 109.3 ?
    C30 C32 H32A . . 109.3 ?
    N8 C32 H32B . . 109.3 ?
    C30 C32 H32B . . 109.3 ?
    H32A C32 H32B . . 107.9 ?
    C36 C33 C42 . . 119.1(5) ?
    C36 C33 H33 . . 120.4 ?
    C42 C33 H33 . . 120.4 ?
    N7 C34 C35 . . 122.1(4) ?
    N7 C34 C29 . . 116.4(4) ?
    C35 C34 C29 . . 121.5(4) ?
    C42 C35 C34 . . 119.1(5) ?
    C42 C35 H35 . . 120.5 ?
    C34 C35 H35 . . 120.5 ?
    N7 C36 C33 . . 122.2(5) ?
    N7 C36 H36 . . 118.9 ?
    C33 C36 H36 . . 118.9 ?
    N6 C37 C39 . . 123.8(4) ?
    N6 C37 H37A . . 106.4 ?
    C39 C37 H37A . . 106.4 ?
    N6 C37 H37B . . 106.4 ?
    C39 C37 H37B . . 106.4 ?
    H37A C37 H37B . . 106.5 ?
    C39 C38 H38A . . 109.5 ?
    C39 C38 H38B . . 109.5 ?
    H38A C38 H38B . . 109.5 ?
    C39 C38 H38C . . 109.5 ?
    H38A C38 H38C . . 109.5 ?
    H38B C38 H38C . . 109.5 ?
    C46 C39 C48 . . 108.7(4) ?
    C46 C39 C38 . . 109.9(4) ?
    C48 C39 C38 . . 107.7(4) ?
    C46 C39 C37 . . 113.8(4) ?
    C48 C39 C37 . . 103.0(4) ?
    C38 C39 C37 . . 113.3(4) ?
    F11 C40 F12 . . 108.4(5) ?
    F11 C40 F7 . . 106.7(4) ?
    F12 C40 F7 . . 108.0(5) ?
    F11 C40 S3 . . 111.4(4) ?
    F12 C40 S3 . . 110.8(4) ?
    F7 C40 S3 . . 111.3(4) ?
    F10 C41 F9 . . 107.5(5) ?
    F10 C41 F8 . . 108.0(5) ?
    F9 C41 F8 . . 108.0(4) ?
    F10 C41 S4 . . 111.5(4) ?
    F9 C41 S4 . . 110.6(4) ?
    F8 C41 S4 . . 111.1(4) ?
    C35 C42 C33 . . 119.2(5) ?
    C35 C42 H42 . . 120.4 ?
    C33 C42 H42 . . 120.4 ?
    N5 C43 C45 . . 123.1(5) ?
    N5 C43 H43 . . 118.5 ?
    C45 C43 H43 . . 118.5 ?
    C47 C44 C30 . . 119.1(5) ?
    C47 C44 H44 . . 120.5 ?
    C30 C44 H44 . . 120.5 ?
    C43 C45 C47 . . 118.3(5) ?
    C43 C45 H45 . . 120.8 ?
    C47 C45 H45 . . 120.8 ?
    C39 C46 H46A . . 109.5 ?
    C39 C46 H46B . . 109.5 ?
    H46A C46 H46B . . 109.5 ?
    C39 C46 H46C . . 109.5 ?
    H46A C46 H46C . . 109.5 ?
    H46B C46 H46C . . 109.5 ?
    C44 C47 C45 . . 119.2(5) ?
    C44 C47 H47 . . 120.4 ?
    C45 C47 H47 . . 120.4 ?
    C39 C48 H48A . . 109.5 ?
    C39 C48 H48B . . 109.5 ?
    H48A C48 H48B . . 109.5 ?
    C39 C48 H48C . . 109.5 ?
    H48A C48 H48C . . 109.5 ?
    H48B C48 H48C . . 109.5 ?
    C76 C49 C78 . . 112.5(6) ?
    C76 C49 C28 . . 105.2(5) ?
    C78 C49 C28 . . 115.5(5) ?
    C76 C49 C77 . . 105.6(5) ?
    C78 C49 C77 . . 107.1(6) ?
    C28 C49 C77 . . 110.5(5) ?
    C72 C50 C57 . . 104.9(4) ?
    C72 C50 C75 . . 109.4(5) ?
    C57 C50 C75 . . 113.8(5) ?
    C72 C50 C66 . . 106.6(5) ?
    C57 C50 C66 . . 112.0(4) ?
    C75 C50 C66 . . 109.8(5) ?
    N10 C51 C63 . . 124.0(5) ?
    N10 C51 H51 . . 118.0 ?
    C63 C51 H51 . . 118.0 ?
    N11 C52 C65 . . 123.4(4) ?
    N11 C52 H52A . . 106.5 ?
    C65 C52 H52A . . 106.5 ?
    N11 C52 H52B . . 106.5 ?
    C65 C52 H52B . . 106.5 ?
    H52A C52 H52B . . 106.5 ?
    N11 C53 C58 . . 110.2(4) ?
    N11 C53 H53A . . 109.6 ?
    C58 C53 H53A . . 109.6 ?
    N11 C53 H53B . . 109.6 ?
    C58 C53 H53B . . 109.6 ?
    H53A C53 H53B . . 108.1 ?
    N10 C54 C62 . . 121.6(5) ?
    N10 C54 C56 . . 117.3(4) ?
    C62 C54 C56 . . 121.1(5) ?
    N12 C55 C61 . . 121.7(5) ?
    N12 C55 C60 . . 116.9(4) ?
    C61 C55 C60 . . 121.3(5) ?
    N9 C56 C54 . . 113.3(4) ?
    N9 C56 H56A . . 108.9 ?
    C54 C56 H56A . . 108.9 ?
    N9 C56 H56B . . 108.9 ?
    C54 C56 H56B . . 108.9 ?
    H56A C56 H56B . . 107.7 ?
    N9 C57 C50 . . 123.8(4) ?
    N9 C57 H57A . . 106.4 ?
    C50 C57 H57A . . 106.4 ?
    N9 C57 H57B . . 106.4 ?
    C50 C57 H57B . . 106.4 ?
    H57A C57 H57B . . 106.5 ?
    N9 C58 C53 . . 112.3(4) ?
    N9 C58 H58A . . 109.1 ?
    C53 C58 H58A . . 109.1 ?
    N9 C58 H58B . . 109.1 ?
    C53 C58 H58B . . 109.1 ?
    H58A C58 H58B . . 107.9 ?
    N12 C59 C68 . . 123.9(5) ?
    N12 C59 H59 . . 118.0 ?
    C68 C59 H59 . . 118.0 ?
    C55 C60 N11 . . 110.1(4) ?
    C55 C60 H60A . . 109.6 ?
    N11 C60 H60A . . 109.6 ?
    C55 C60 H60B . . 109.6 ?
    N11 C60 H60B . . 109.6 ?
    H60A C60 H60B . . 108.2 ?
    C67 C61 C55 . . 119.2(5) ?
    C67 C61 H61 . . 120.4 ?
    C55 C61 H61 . . 120.4 ?
    C71 C62 C54 . . 119.8(5) ?
    C71 C62 H62 . . 120.1 ?
    C54 C62 H62 . . 120.1 ?
    C51 C63 C71 . . 117.5(5) ?
    C51 C63 H63 . . 121.2 ?
    C71 C63 H63 . . 121.2 ?
    C65 C64 H64A . . 109.5 ?
    C65 C64 H64B . . 109.5 ?
    H64A C64 H64B . . 109.5 ?
    C65 C64 H64C . . 109.5 ?
    H64A C64 H64C . . 109.5 ?
    H64B C64 H64C . . 109.5 ?
    C64 C65 C74 . . 107.0(4) ?
    C64 C65 C52 . . 113.5(4) ?
    C74 C65 C52 . . 104.2(4) ?
    C64 C65 C69 . . 108.6(4) ?
    C74 C65 C69 . . 108.6(5) ?
    C52 C65 C69 . . 114.6(4) ?
    C50 C66 H66A . . 109.5 ?
    C50 C66 H66B . . 109.5 ?
    H66A C66 H66B . . 109.5 ?
    C50 C66 H66C . . 109.5 ?
    H66A C66 H66C . . 109.5 ?
    H66B C66 H66C . . 109.5 ?
    C61 C67 C68 . . 119.4(5) ?
    C61 C67 H67 . . 120.3 ?
    C68 C67 H67 . . 120.3 ?
    C59 C68 C67 . . 117.9(5) ?
    C59 C68 H68 . . 121.1 ?
    C67 C68 H68 . . 121.1 ?
    C65 C69 H69A . . 109.5 ?
    C65 C69 H69B . . 109.5 ?
    H69A C69 H69B . . 109.5 ?
    C65 C69 H69C . . 109.5 ?
    H69A C69 H69C . . 109.5 ?
    H69B C69 H69C . . 109.5 ?
    F17 C70 F14 . . 107.1(5) ?
    F17 C70 F15 . . 109.1(5) ?
    F14 C70 F15 . . 107.4(5) ?
    F17 C70 S6 . . 111.4(4) ?
    F14 C70 S6 . . 110.7(4) ?
    F15 C70 S6 . . 111.0(4) ?
    C62 C71 C63 . . 119.2(5) ?
    C62 C71 H71 . . 120.4 ?
    C63 C71 H71 . . 120.4 ?
    C50 C72 H72A . . 109.5 ?
    C50 C72 H72B . . 109.5 ?
    H72A C72 H72B . . 109.5 ?
    C50 C72 H72C . . 109.5 ?
    H72A C72 H72C . . 109.5 ?
    H72B C72 H72C . . 109.5 ?
    F18 C73 F13 . . 108.8(5) ?
    F18 C73 F16 . . 107.6(7) ?
    F13 C73 F16 . . 107.4(5) ?
    F18 C73 S5 . . 113.6(5) ?
    F13 C73 S5 . . 109.0(5) ?
    F16 C73 S5 . . 110.4(4) ?
    C65 C74 H74A . . 109.5 ?
    C65 C74 H74B . . 109.5 ?
    H74A C74 H74B . . 109.5 ?
    C65 C74 H74C . . 109.5 ?
    H74A C74 H74C . . 109.5 ?
    H74B C74 H74C . . 109.5 ?
    C50 C75 H75A . . 109.5 ?
    C50 C75 H75B . . 109.5 ?
    H75A C75 H75B . . 109.5 ?
    C50 C75 H75C . . 109.5 ?
    H75A C75 H75C . . 109.5 ?
    H75B C75 H75C . . 109.5 ?
    C49 C76 H76A . . 109.5 ?
    C49 C76 H76B . . 109.5 ?
    H76A C76 H76B . . 109.5 ?
    C49 C76 H76C . . 109.5 ?
    H76A C76 H76C . . 109.5 ?
    H76B C76 H76C . . 109.5 ?
    C49 C77 H77A . . 109.5 ?
    C49 C77 H77B . . 109.5 ?
    H77A C77 H77B . . 109.5 ?
    C49 C77 H77C . . 109.5 ?
    H77A C77 H77C . . 109.5 ?
    H77B C77 H77C . . 109.5 ?
    C49 C78 H78A . . 109.5 ?
    C49 C78 H78B . . 109.5 ?
    H78A C78 H78B . . 109.5 ?
    C49 C78 H78C . . 109.5 ?
    H78A C78 H78C . . 109.5 ?
    H78B C78 H78C . . 109.5 ?
